# Supplementary material for: Effects of transcranial static magnetic stimulation over the primary motor cortex on local and network spontaneous electroencephalogram oscillations
Source: PubMed Central journal article supplement (PMC8050201; doi:10.1038/s41598-021-87746-2), 2021-04-15
Supplement: 41598_2021_87746_MOESM1_ESM.pdf [file 41598_2021_87746_MOESM1_ESM.pdf]

# Effects of Transcranial Static Magnetic Stimulation over the Primary Motor Cortex on Local and Network Spontaneous Electroencephalogram Oscillations

Sumiya Shibata<sup>1\*</sup>, Tatsunori Watanabe<sup>2</sup>, Yoshihiro Yukawa<sup>3</sup>, Masatoshi Minakuchi<sup>3</sup>, Ryota Shimomura<sup>3</sup>, Sachimori Ichimura<sup>3</sup>, Hikari Kirimoto<sup>2</sup>, Tatsuya Mima<sup>4\*</sup>

1 Kinugasa Research Organization, Ritsumeikan University

56-1, Tojiin, Kitamachi, Kita-ku, Kyoto

603-8577, Kyoto, JAPAN

2 Department of Sensorimotor Neuroscience, Graduate School of Biomedical and Health Sciences, Hiroshima University

1-2-3 Kasumi, Minami-ku, Hiroshima

734-8553, Hiroshima, JAPAN

3 Department of Rehabilitation, Murata Hospital

4-2-1, Tajima, Ikuno-ku, Osaka

544-0011, Osaka, JAPAN

4 The Graduate School of Core Ethics and Frontier Sciences, Ritsumeikan University

56-1, Tojiin, Kitamachi, Kita-ku, Kyoto

603-8577, Kyoto, JAPAN

| frequency | region    | the changes in the wPLI |                  |       |                      |
|-----------|-----------|-------------------------|------------------|-------|----------------------|
|           |           | real                    |                  | sham  |                      |
| theta     | C3 - Fp1  | 0.05                    | ( 0.02 — 0.09 )  | 0.02  | ( -0.09 — 0.04 ) †   |
|           | C3 - Fz   | 0.02                    | ( -0.03 — 0.08 ) | -0.01 | ( -0.03 — 0.04 )     |
|           | C3 - F3   | 0.07                    | ( 0.03 — 0.14 )  | -0.01 | ( -0.08 — 0.08 )     |
|           | C3 - F7   | 0.02                    | ( 0.00 — 0.06 )  | 0.03  | ( 0.01 — 0.07 )      |
|           | C3 - FT9  | 0.00                    | ( -0.04 — 0.13 ) | 0.02  | ( -0.02 — 0.09 )     |
|           | C3 - FC5  | 0.08                    | ( -0.06 — 0.16 ) | 0.00  | ( -0.06 — 0.04 )     |
|           | C3 - FC1  | 0.04                    | ( -0.05 — 0.09 ) | -0.03 | ( -0.04 — 0.07 )     |
|           | C3 - T7   | 0.04                    | ( -0.02 — 0.12 ) | 0.00  | ( -0.08 — 0.09 )     |
|           | C3 - TP9  | 0.02                    | ( -0.04 — 0.07 ) | 0.03  | ( -0.04 — 0.09 )     |
|           | C3 - CP5  | -0.01                   | ( -0.06 — 0.05 ) | 0.03  | ( -0.02 — 0.07 )     |
|           | C3 - CP1  | -0.01                   | ( -0.05 — 0.04 ) | 0.04  | ( -0.02 — 0.07 )     |
|           | C3 - Pz   | 0.04                    | ( 0.02 — 0.08 )  | -0.04 | ( -0.13 — 0.04 ) * † |
|           | C3 - P3   | 0.00                    | ( -0.02 — 0.10 ) | 0.00  | ( -0.03 — 0.03 )     |
|           | C3 - P7   | -0.02                   | ( -0.07 — 0.02 ) | -0.01 | ( -0.04 — 0.03 )     |
|           | C3 - O1   | -0.01                   | ( -0.14 — 0.03 ) | -0.02 | ( -0.09 — 0.00 )     |
|           | C3 - Oz   | 0.02                    | ( -0.03 — 0.08 ) | -0.04 | ( -0.06 — 0.02 )     |
|           | C3 - O2   | 0.02                    | ( -0.03 — 0.07 ) | -0.03 | ( -0.06 — 0.00 )     |
|           | C3 - P4   | 0.02                    | ( -0.01 — 0.07 ) | 0.01  | ( -0.07 — 0.04 )     |
|           | C3 - P8   | 0.02                    | ( -0.06 — 0.06 ) | 0.01  | ( -0.05 — 0.10 )     |
|           | C3 - TP10 | 0.04                    | ( -0.01 — 0.06 ) | 0.03  | ( 0.01 — 0.06 )      |

|           |                        |                            |
|-----------|------------------------|----------------------------|
| C3 - CP6  | 0.00 ( -0.08 — 0.02 )  | 0.00 ( -0.02 — 0.03 )      |
| C3 - CP2  | 0.07 ( -0.03 — 0.14 )  | -0.01 ( -0.04 — 0.03 ) * † |
| C3 - Cz   | -0.01 ( -0.09 — 0.08 ) | 0.00 ( -0.02 — 0.08 )      |
| C3 - C4   | 0.04 ( -0.02 — 0.08 )  | -0.01 ( -0.03 — 0.06 )     |
| C3 - T8   | -0.01 ( -0.07 — 0.02 ) | 0.00 ( -0.05 — 0.02 )      |
| C3 - FT10 | 0.02 ( -0.09 — 0.25 )  | -0.08 ( -0.11 — 0.00 ) †   |
| C3 - FC6  | 0.06 ( -0.04 — 0.10 )  | -0.05 ( -0.10 — 0.00 )     |
| C3 - FC2  | -0.02 ( -0.09 — 0.05 ) | 0.02 ( -0.05 — 0.05 )      |
| C3 - F4   | 0.07 ( -0.03 — 0.12 )  | -0.05 ( -0.10 — 0.02 )     |
| C3 - F8   | 0.01 ( -0.06 — 0.09 )  | 0.01 ( -0.03 — 0.04 )      |
| C3 - Fp2  | 0.04 ( -0.05 — 0.09 )  | -0.02 ( -0.07 — 0.00 )     |
| C3 - AF7  | 0.05 ( 0.00 — 0.11 )   | 0.03 ( -0.03 — 0.10 )      |
| C3 - AF3  | 0.06 ( 0.05 — 0.10 )   | 0.01 ( -0.08 — 0.06 )      |
| C3 - AFz  | 0.05 ( 0.00 — 0.11 )   | 0.02 ( -0.02 — 0.17 )      |
| C3 - F1   | 0.04 ( -0.03 — 0.08 )  | 0.00 ( -0.06 — 0.09 )      |
| C3 - F5   | 0.11 ( 0.01 — 0.15 )   | 0.03 ( -0.01 — 0.06 )      |
| C3 - FT7  | 0.02 ( -0.06 — 0.19 )  | 0.00 ( -0.01 — 0.09 )      |
| C3 - FC3  | 0.00 ( -0.03 — 0.07 )  | 0.02 ( -0.04 — 0.08 )      |
| C3 - C1   | 0.00 ( -0.04 — 0.15 )  | 0.07 ( 0.04 — 0.10 )       |
| C3 - C5   | 0.05 ( 0.01 — 0.11 )   | 0.04 ( 0.01 — 0.06 )       |
| C3 - TP7  | 0.01 ( -0.03 — 0.07 )  | -0.01 ( -0.07 — 0.05 )     |

|          |                         |                            |
|----------|-------------------------|----------------------------|
| C3 - CP3 | 0.00 ( -0.06 — 0.12 )   | 0.02 ( -0.01 — 0.05 )      |
| C3 - P1  | 0.02 ( -0.02 — 0.13 )   | -0.03 ( -0.05 — 0.03 ) * † |
| C3 - P5  | -0.03 ( -0.05 — 0.07 )  | 0.02 ( -0.03 — 0.04 )      |
| C3 - PO7 | -0.05 ( -0.10 — -0.02 ) | -0.02 ( -0.05 — 0.01 )     |
| C3 - PO3 | 0.00 ( -0.07 — 0.10 )   | 0.00 ( -0.03 — 0.03 )      |
| C3 - POz | 0.03 ( -0.01 — 0.09 )   | -0.02 ( -0.06 — 0.01 )     |
| C3 - PO4 | 0.05 ( 0.02 — 0.08 )    | 0.01 ( -0.06 — 0.02 ) * †  |
| C3 - PO8 | 0.06 ( 0.01 — 0.14 )    | 0.02 ( -0.04 — 0.04 )      |
| C3 - P6  | 0.02 ( -0.02 — 0.05 )   | 0.02 ( -0.05 — 0.05 )      |
| C3 - P2  | 0.05 ( -0.01 — 0.09 )   | -0.01 ( -0.10 — 0.03 ) * † |
| C3 - CPz | 0.05 ( 0.00 — 0.10 )    | 0.00 ( -0.07 — 0.06 )      |
| C3 - CP4 | 0.01 ( -0.04 — 0.09 )   | 0.00 ( -0.04 — 0.02 )      |
| C3 - TP8 | 0.00 ( -0.02 — 0.03 )   | 0.03 ( -0.04 — 0.06 )      |
| C3 - C6  | 0.01 ( -0.01 — 0.05 )   | -0.02 ( -0.08 — 0.04 )     |
| C3 - C2  | 0.03 ( -0.03 — 0.11 )   | 0.02 ( -0.06 — 0.07 )      |
| C3 - FC4 | 0.03 ( -0.07 — 0.10 )   | -0.03 ( -0.07 — 0.06 )     |
| C3 - FT8 | 0.00 ( -0.06 — 0.09 )   | -0.04 ( -0.08 — -0.02 )    |
| C3 - F6  | 0.02 ( 0.00 — 0.04 )    | -0.01 ( -0.09 — 0.10 )     |
| C3 - AF8 | 0.03 ( -0.01 — 0.06 )   | 0.02 ( -0.08 — 0.10 )      |
| C3 - AF4 | 0.03 ( 0.00 — 0.10 )    | 0.00 ( -0.03 — 0.04 )      |
| C3 - F2  | 0.01 ( -0.04 — 0.05 )   | 0.01 ( -0.05 — 0.03 )      |

alpha

|           |                        |                        |
|-----------|------------------------|------------------------|
| C3 - Fp1  | -0.02 ( -0.10 — 0.02 ) | -0.01 ( -0.06 — 0.04 ) |
| C3 - Fz   | 0.00 ( -0.11 — 0.08 )  | 0.09 ( -0.03 — 0.13 )  |
| C3 - F3   | 0.04 ( 0.00 — 0.16 )   | 0.06 ( 0.02 — 0.09 )   |
| C3 - F7   | -0.08 ( -0.12 — 0.09 ) | 0.01 ( -0.07 — 0.09 )  |
| C3 - FT9  | -0.03 ( -0.12 — 0.04 ) | 0.01 ( -0.04 — 0.10 )  |
| C3 - FC5  | 0.01 ( -0.01 — 0.07 )  | 0.04 ( -0.01 — 0.15 )  |
| C3 - FC1  | 0.05 ( -0.09 — 0.11 )  | 0.05 ( 0.00 — 0.24 )   |
| C3 - T7   | 0.06 ( -0.01 — 0.14 )  | -0.01 ( -0.09 — 0.05 ) |
| C3 - TP9  | -0.01 ( -0.05 — 0.09 ) | -0.07 ( -0.11 — 0.03 ) |
| C3 - CP5  | -0.04 ( -0.10 — 0.09 ) | 0.01 ( -0.06 — 0.12 )  |
| C3 - CP1  | 0.04 ( -0.13 — 0.06 )  | -0.03 ( -0.12 — 0.06 ) |
| C3 - Pz   | -0.05 ( -0.12 — 0.00 ) | -0.03 ( -0.10 — 0.00 ) |
| C3 - P3   | -0.08 ( -0.13 — 0.04 ) | 0.01 ( -0.08 — 0.18 )  |
| C3 - P7   | 0.06 ( -0.07 — 0.15 )  | 0.10 ( -0.01 — 0.16 )  |
| C3 - O1   | 0.00 ( -0.04 — 0.10 )  | -0.02 ( -0.04 — 0.05 ) |
| C3 - Oz   | -0.06 ( -0.14 — 0.03 ) | 0.00 ( -0.05 — 0.03 )  |
| C3 - O2   | 0.00 ( -0.11 — 0.05 )  | 0.05 ( -0.01 — 0.09 )  |
| C3 - P4   | -0.02 ( -0.13 — 0.00 ) | 0.00 ( -0.11 — 0.12 )  |
| C3 - P8   | -0.01 ( -0.06 — 0.01 ) | 0.07 ( 0.01 — 0.19 ) † |
| C3 - TP10 | 0.00 ( -0.15 — 0.06 )  | 0.02 ( -0.02 — 0.15 )  |

|           |                         |                        |   |
|-----------|-------------------------|------------------------|---|
| C3 - CP6  | -0.04 ( -0.11 — -0.02 ) | 0.05 ( -0.01 — 0.19 )  | † |
| C3 - CP2  | -0.02 ( -0.09 — 0.09 )  | -0.06 ( -0.14 — 0.00 ) |   |
| C3 - Cz   | -0.04 ( -0.13 — 0.06 )  | 0.09 ( 0.02 — 0.24 )   | † |
| C3 - C4   | -0.01 ( -0.07 — 0.07 )  | 0.00 ( -0.07 — 0.02 )  |   |
| C3 - T8   | -0.04 ( -0.12 — 0.03 )  | 0.09 ( -0.03 — 0.15 )  | † |
| C3 - FT10 | -0.02 ( -0.05 — 0.13 )  | -0.01 ( -0.13 — 0.15 ) |   |
| C3 - FC6  | 0.02 ( -0.06 — 0.06 )   | 0.05 ( -0.04 — 0.07 )  |   |
| C3 - FC2  | 0.06 ( 0.01 — 0.08 )    | 0.01 ( -0.09 — 0.11 )  |   |
| C3 - F4   | 0.01 ( -0.06 — 0.06 )   | 0.01 ( -0.04 — 0.11 )  |   |
| C3 - F8   | 0.07 ( 0.02 — 0.13 )    | 0.05 ( 0.00 — 0.16 )   |   |
| C3 - Fp2  | -0.07 ( -0.15 — 0.08 )  | 0.05 ( -0.08 — 0.15 )  |   |
| C3 - AF7  | -0.02 ( -0.09 — 0.11 )  | -0.01 ( -0.10 — 0.05 ) |   |
| C3 - AF3  | -0.01 ( -0.10 — 0.09 )  | 0.07 ( -0.02 — 0.15 )  |   |
| C3 - AFz  | 0.05 ( -0.11 — 0.13 )   | 0.04 ( -0.01 — 0.10 )  |   |
| C3 - F1   | -0.04 ( -0.13 — 0.14 )  | 0.04 ( -0.03 — 0.11 )  |   |
| C3 - F5   | 0.08 ( -0.05 — 0.17 )   | 0.04 ( -0.06 — 0.09 )  |   |
| C3 - FT7  | -0.07 ( -0.10 — 0.04 )  | 0.03 ( -0.04 — 0.05 )  |   |
| C3 - FC3  | 0.09 ( -0.01 — 0.21 )   | 0.06 ( -0.01 — 0.15 )  |   |
| C3 - C1   | -0.03 ( -0.18 — 0.15 )  | 0.09 ( 0.00 — 0.22 )   |   |
| C3 - C5   | -0.02 ( -0.12 — 0.08 )  | 0.01 ( -0.08 — 0.12 )  |   |
| C3 - TP7  | 0.07 ( -0.01 — 0.15 )   | -0.03 ( -0.13 — 0.08 ) |   |

|          |                         |                         |
|----------|-------------------------|-------------------------|
| C3 - CP3 | -0.03 ( -0.12 — 0.04 )  | 0.00 ( -0.08 — 0.16 )   |
| C3 - P1  | -0.05 ( -0.10 — 0.05 )  | -0.02 ( -0.11 — 0.13 )  |
| C3 - P5  | -0.01 ( -0.09 — 0.05 )  | 0.06 ( -0.07 — 0.17 )   |
| C3 - PO7 | 0.07 ( -0.04 — 0.09 )   | 0.03 ( -0.05 — 0.10 )   |
| C3 - PO3 | 0.00 ( -0.07 — 0.08 )   | -0.03 ( -0.04 — 0.11 )  |
| C3 - POz | -0.06 ( -0.12 — 0.01 )  | -0.05 ( -0.07 — -0.01 ) |
| C3 - PO4 | -0.07 ( -0.16 — 0.02 )  | 0.02 ( -0.04 — 0.06 )   |
| C3 - PO8 | 0.00 ( -0.11 — 0.02 )   | 0.04 ( -0.06 — 0.13 ) † |
| C3 - P6  | -0.07 ( -0.11 — 0.01 )  | 0.13 ( -0.05 — 0.23 ) † |
| C3 - P2  | -0.05 ( -0.09 — 0.05 )  | -0.02 ( -0.07 — 0.01 )  |
| C3 - CPz | -0.01 ( -0.10 — 0.03 )  | -0.02 ( -0.12 — 0.02 )  |
| C3 - CP4 | -0.09 ( -0.15 — -0.04 ) | -0.05 ( -0.15 — 0.04 )  |
| C3 - TP8 | 0.04 ( 0.02 — 0.07 )    | 0.10 ( -0.04 — 0.25 )   |
| C3 - C6  | -0.03 ( -0.06 — 0.08 )  | 0.00 ( -0.05 — 0.09 )   |
| C3 - C2  | 0.02 ( -0.06 — 0.07 )   | 0.05 ( 0.01 — 0.10 )    |
| C3 - FC4 | 0.01 ( -0.01 — 0.05 )   | 0.02 ( -0.10 — 0.10 )   |
| C3 - FT8 | 0.01 ( -0.01 — 0.07 )   | 0.04 ( -0.08 — 0.14 )   |
| C3 - F6  | -0.01 ( -0.05 — 0.05 )  | 0.02 ( -0.01 — 0.07 )   |
| C3 - AF8 | -0.03 ( -0.11 — 0.08 )  | 0.08 ( -0.04 — 0.16 )   |
| C3 - AF4 | 0.02 ( -0.07 — 0.11 )   | 0.13 ( -0.03 — 0.19 )   |
| C3 - F2  | 0.00 ( -0.07 — 0.10 )   | 0.04 ( 0.02 — 0.09 )    |

|      |           |                         |                         |
|------|-----------|-------------------------|-------------------------|
|      | C3 - Fp1  | -0.01 ( -0.03 — 0.03 )  | 0.00 ( -0.04 — 0.02 )   |
|      | C3 - Fz   | -0.03 ( -0.05 — 0.00 )  | -0.01 ( -0.04 — 0.03 )  |
|      | C3 - F3   | 0.01 ( -0.01 — 0.03 )   | 0.03 ( 0.00 — 0.07 ) †  |
|      | C3 - F7   | 0.00 ( -0.03 — 0.02 )   | 0.02 ( -0.03 — 0.06 )   |
|      | C3 - FT9  | -0.01 ( -0.02 — 0.01 )  | 0.01 ( -0.01 — 0.07 ) † |
|      | C3 - FC5  | 0.03 ( 0.01 — 0.04 )    | 0.02 ( -0.02 — 0.06 )   |
|      | C3 - FC1  | -0.01 ( -0.05 — 0.04 )  | 0.02 ( -0.07 — 0.07 )   |
|      | C3 - T7   | -0.01 ( -0.07 — 0.07 )  | 0.00 ( -0.04 — 0.04 )   |
|      | C3 - TP9  | 0.02 ( -0.02 — 0.05 )   | 0.01 ( -0.04 — 0.04 )   |
|      | C3 - CP5  | -0.01 ( -0.13 — 0.01 )  | 0.02 ( 0.00 — 0.07 ) †  |
| beta | C3 - CP1  | -0.01 ( -0.07 — 0.03 )  | 0.01 ( -0.03 — 0.03 )   |
|      | C3 - Pz   | 0.00 ( -0.04 — 0.05 )   | 0.00 ( -0.06 — 0.01 )   |
|      | C3 - P3   | -0.02 ( -0.06 — -0.01 ) | 0.00 ( -0.04 — 0.10 )   |
|      | C3 - P7   | -0.05 ( -0.08 — -0.03 ) | 0.04 ( -0.01 — 0.07 ) † |
|      | C3 - O1   | 0.01 ( -0.03 — 0.03 )   | 0.00 ( -0.04 — 0.02 )   |
|      | C3 - Oz   | 0.00 ( -0.03 — 0.02 )   | 0.01 ( -0.02 — 0.02 )   |
|      | C3 - O2   | 0.00 ( -0.01 — 0.03 )   | -0.03 ( -0.05 — 0.01 )  |
|      | C3 - P4   | 0.00 ( -0.02 — 0.03 )   | 0.01 ( -0.01 — 0.02 )   |
|      | C3 - P8   | 0.00 ( -0.05 — 0.02 )   | 0.00 ( -0.02 — 0.02 )   |
|      | C3 - TP10 | 0.00 ( -0.01 — 0.02 )   | -0.01 ( -0.05 — 0.01 )  |



|           |                        |                         |
|-----------|------------------------|-------------------------|
| C3 - CP6  | 0.01 ( 0.00 — 0.03 )   | 0.00 ( -0.02 — 0.06 )   |
| C3 - CP2  | 0.01 ( -0.01 — 0.02 )  | 0.01 ( -0.01 — 0.06 )   |
| C3 - Cz   | -0.01 ( -0.02 — 0.03 ) | -0.01 ( -0.03 — 0.05 )  |
| C3 - C4   | -0.01 ( -0.02 — 0.03 ) | -0.01 ( -0.03 — 0.02 )  |
| C3 - T8   | 0.01 ( -0.01 — 0.02 )  | -0.01 ( -0.03 — 0.02 )  |
| C3 - FT10 | 0.00 ( -0.02 — 0.03 )  | 0.02 ( 0.00 — 0.04 )    |
| C3 - FC6  | 0.01 ( -0.03 — 0.03 )  | -0.01 ( -0.02 — 0.02 )  |
| C3 - FC2  | 0.00 ( -0.02 — 0.02 )  | -0.02 ( -0.03 — 0.03 )  |
| C3 - F4   | 0.00 ( -0.05 — 0.02 )  | 0.04 ( -0.01 — 0.08 ) † |
| C3 - F8   | 0.00 ( -0.05 — 0.02 )  | 0.01 ( -0.01 — 0.02 )   |
| C3 - Fp2  | -0.01 ( -0.03 — 0.02 ) | -0.01 ( -0.04 — 0.06 )  |
| C3 - AF7  | 0.00 ( -0.02 — 0.04 )  | 0.00 ( -0.03 — 0.04 )   |
| C3 - AF3  | -0.01 ( -0.06 — 0.01 ) | 0.03 ( 0.00 — 0.05 )    |
| C3 - AFz  | -0.01 ( -0.03 — 0.01 ) | 0.00 ( -0.02 — 0.04 )   |
| C3 - F1   | -0.02 ( -0.05 — 0.00 ) | 0.02 ( -0.08 — 0.05 )   |
| C3 - F5   | 0.01 ( -0.02 — 0.04 )  | 0.03 ( 0.00 — 0.09 )    |
| C3 - FT7  | -0.03 ( -0.06 — 0.02 ) | 0.01 ( -0.04 — 0.02 )   |
| C3 - FC3  | -0.02 ( -0.05 — 0.04 ) | 0.02 ( 0.00 — 0.07 )    |
| C3 - C1   | -0.02 ( -0.04 — 0.06 ) | 0.02 ( -0.02 — 0.04 )   |
| C3 - C5   | 0.01 ( -0.05 — 0.04 )  | 0.00 ( -0.01 — 0.05 )   |
| C3 - TP7  | -0.01 ( -0.03 — 0.01 ) | 0.01 ( -0.02 — 0.06 )   |

|          |                         |                         |
|----------|-------------------------|-------------------------|
| C3 - CP3 | -0.02 ( -0.04 — 0.03 )  | -0.03 ( -0.04 — 0.06 )  |
| C3 - P1  | 0.00 ( -0.04 — 0.01 )   | 0.01 ( -0.02 — 0.02 )   |
| C3 - P5  | -0.04 ( -0.06 — -0.01 ) | 0.04 ( -0.03 — 0.10 ) † |
| C3 - PO7 | -0.04 ( -0.07 — 0.02 )  | -0.02 ( -0.03 — 0.03 )  |
| C3 - PO3 | -0.01 ( -0.03 — 0.00 )  | 0.00 ( -0.06 — 0.01 )   |
| C3 - POz | 0.00 ( -0.02 — 0.02 )   | -0.01 ( -0.02 — 0.00 )  |
| C3 - PO4 | 0.01 ( 0.00 — 0.02 )    | -0.02 ( -0.03 — 0.01 )  |
| C3 - PO8 | 0.00 ( -0.01 — 0.02 )   | -0.01 ( -0.03 — 0.01 )  |
| C3 - P6  | 0.00 ( -0.01 — 0.03 )   | -0.02 ( -0.05 — 0.00 )  |
| C3 - P2  | -0.02 ( -0.04 — 0.01 )  | 0.00 ( -0.02 — 0.01 )   |
| C3 - CPz | 0.02 ( 0.00 — 0.04 )    | 0.00 ( -0.02 — 0.03 )   |
| C3 - CP4 | 0.03 ( 0.01 — 0.04 )    | 0.01 ( -0.05 — 0.05 )   |
| C3 - TP8 | 0.02 ( -0.03 — 0.04 )   | 0.02 ( -0.03 — 0.05 )   |
| C3 - C6  | -0.01 ( -0.02 — 0.03 )  | -0.01 ( -0.03 — 0.04 )  |
| C3 - C2  | 0.01 ( -0.02 — 0.02 )   | -0.01 ( -0.02 — 0.05 )  |
| C3 - FC4 | 0.01 ( -0.02 — 0.03 )   | 0.01 ( -0.01 — 0.03 )   |
| C3 - FT8 | 0.00 ( -0.03 — 0.01 )   | 0.00 ( -0.01 — 0.01 )   |
| C3 - F6  | -0.02 ( -0.05 — 0.02 )  | 0.01 ( -0.01 — 0.05 )   |
| C3 - AF8 | -0.04 ( -0.06 — 0.00 )  | 0.01 ( -0.02 — 0.02 )   |
| C3 - AF4 | -0.03 ( -0.04 — 0.00 )  | 0.01 ( -0.02 — 0.03 ) † |
| C3 - F2  | -0.02 ( -0.04 — 0.00 )  | 0.01 ( -0.02 — 0.06 )   |

## Supplementary Table S1

The changes in the wPLI for real and sham tSMS for each frequency band. The largest cluster of significant electrode pairs was identified as C3-Pz, C3-CP2, C3-P1, C3-PO4, and C3-P2 for the theta band (\*). The significant electrode pairs are indicated by †.

| frequency | region   | the wPLI             |                      |                      |                      |
|-----------|----------|----------------------|----------------------|----------------------|----------------------|
|           |          | pre                  | real                 | post                 | sham                 |
| theta     | C3 - Fp1 | 0.05 ( 0.03 - 0.11 ) | 0.12 ( 0.09 - 0.18 ) | 0.09 ( 0.06 - 0.16 ) | 0.06 ( 0.03 - 0.12 ) |
|           | C3 - Fz  | 0.10 ( 0.06 - 0.19 ) | 0.15 ( 0.08 - 0.22 ) | 0.10 ( 0.07 - 0.20 ) | 0.10 ( 0.07 - 0.25 ) |
|           | C3 - F3  | 0.08 ( 0.03 - 0.20 ) | 0.17 ( 0.11 - 0.22 ) | 0.20 ( 0.08 - 0.25 ) | 0.10 ( 0.07 - 0.24 ) |
|           | C3 - F7  | 0.11 ( 0.05 - 0.14 ) | 0.13 ( 0.07 - 0.20 ) | 0.06 ( 0.01 - 0.11 ) | 0.11 ( 0.03 - 0.18 ) |
|           | C3 - FT9 | 0.06 ( 0.06 - 0.11 ) | 0.12 ( 0.03 - 0.26 ) | 0.07 ( 0.02 - 0.14 ) | 0.06 ( 0.03 - 0.15 ) |
|           | C3 - FC5 | 0.08 ( 0.05 - 0.19 ) | 0.12 ( 0.05 - 0.28 ) | 0.10 ( 0.02 - 0.13 ) | 0.08 ( 0.05 - 0.11 ) |
|           | C3 - FC1 | 0.12 ( 0.09 - 0.24 ) | 0.16 ( 0.10 - 0.29 ) | 0.16 ( 0.07 - 0.18 ) | 0.15 ( 0.10 - 0.22 ) |
|           | C3 - T7  | 0.06 ( 0.02 - 0.08 ) | 0.08 ( 0.05 - 0.15 ) | 0.10 ( 0.07 - 0.13 ) | 0.11 ( 0.04 - 0.14 ) |
|           | C3 - TP9 | 0.08 ( 0.05 - 0.18 ) | 0.07 ( 0.03 - 0.23 ) | 0.06 ( 0.03 - 0.09 ) | 0.11 ( 0.04 - 0.14 ) |
|           | C3 - CP5 | 0.08 ( 0.04 - 0.15 ) | 0.05 ( 0.02 - 0.16 ) | 0.05 ( 0.04 - 0.10 ) | 0.10 ( 0.07 - 0.12 ) |
|           | C3 - CP1 | 0.09 ( 0.05 - 0.13 ) | 0.06 ( 0.02 - 0.14 ) | 0.07 ( 0.02 - 0.12 ) | 0.11 ( 0.07 - 0.21 ) |
|           | C3 - Pz  | 0.03 ( 0.01 - 0.11 ) | 0.11 ( 0.07 - 0.15 ) | 0.11 ( 0.05 - 0.16 ) | 0.07 ( 0.02 - 0.10 ) |

|           |                      |                      |                      |                      |
|-----------|----------------------|----------------------|----------------------|----------------------|
| C3 - P3   | 0.07 ( 0.03 - 0.09 ) | 0.06 ( 0.04 - 0.14 ) | 0.13 ( 0.05 - 0.18 ) | 0.07 ( 0.03 - 0.17 ) |
| C3 - P7   | 0.10 ( 0.03 - 0.15 ) | 0.09 ( 0.03 - 0.13 ) | 0.09 ( 0.07 - 0.11 ) | 0.08 ( 0.06 - 0.09 ) |
| C3 - O1   | 0.10 ( 0.04 - 0.16 ) | 0.04 ( 0.03 - 0.08 ) | 0.08 ( 0.03 - 0.15 ) | 0.05 ( 0.02 - 0.09 ) |
| C3 - Oz   | 0.05 ( 0.02 - 0.12 ) | 0.06 ( 0.04 - 0.12 ) | 0.09 ( 0.04 - 0.12 ) | 0.04 ( 0.02 - 0.07 ) |
| C3 - O2   | 0.07 ( 0.03 - 0.10 ) | 0.09 ( 0.02 - 0.14 ) | 0.05 ( 0.03 - 0.11 ) | 0.02 ( 0.01 - 0.05 ) |
| C3 - P4   | 0.03 ( 0.02 - 0.11 ) | 0.10 ( 0.04 - 0.12 ) | 0.10 ( 0.04 - 0.15 ) | 0.06 ( 0.04 - 0.15 ) |
| C3 - P8   | 0.06 ( 0.05 - 0.15 ) | 0.08 ( 0.03 - 0.16 ) | 0.07 ( 0.02 - 0.11 ) | 0.06 ( 0.04 - 0.14 ) |
| C3 - TP10 | 0.09 ( 0.05 - 0.15 ) | 0.09 ( 0.04 - 0.23 ) | 0.07 ( 0.03 - 0.09 ) | 0.09 ( 0.07 - 0.11 ) |
| C3 - CP6  | 0.09 ( 0.04 - 0.12 ) | 0.08 ( 0.02 - 0.13 ) | 0.07 ( 0.05 - 0.12 ) | 0.06 ( 0.04 - 0.12 ) |
| C3 - CP2  | 0.07 ( 0.02 - 0.10 ) | 0.13 ( 0.04 - 0.18 ) | 0.06 ( 0.02 - 0.15 ) | 0.09 ( 0.04 - 0.11 ) |
| C3 - Cz   | 0.07 ( 0.03 - 0.11 ) | 0.08 ( 0.04 - 0.14 ) | 0.06 ( 0.03 - 0.11 ) | 0.09 ( 0.04 - 0.15 ) |
| C3 - C4   | 0.04 ( 0.02 - 0.10 ) | 0.08 ( 0.03 - 0.17 ) | 0.05 ( 0.02 - 0.11 ) | 0.06 ( 0.05 - 0.09 ) |
| C3 - T8   | 0.09 ( 0.04 - 0.12 ) | 0.06 ( 0.03 - 0.10 ) | 0.05 ( 0.00 - 0.15 ) | 0.05 ( 0.03 - 0.09 ) |
| C3 - FT10 | 0.10 ( 0.04 - 0.15 ) | 0.11 ( 0.05 - 0.26 ) | 0.13 ( 0.08 - 0.15 ) | 0.03 ( 0.02 - 0.06 ) |

|          |                      |                      |                      |                      |
|----------|----------------------|----------------------|----------------------|----------------------|
| C3 - FC6 | 0.07 ( 0.02 - 0.14 ) | 0.10 ( 0.06 - 0.14 ) | 0.11 ( 0.08 - 0.17 ) | 0.07 ( 0.05 - 0.09 ) |
| C3 - FC2 | 0.10 ( 0.06 - 0.14 ) | 0.07 ( 0.06 - 0.13 ) | 0.08 ( 0.04 - 0.15 ) | 0.10 ( 0.06 - 0.13 ) |
| C3 - F4  | 0.06 ( 0.03 - 0.10 ) | 0.11 ( 0.08 - 0.21 ) | 0.14 ( 0.10 - 0.18 ) | 0.11 ( 0.04 - 0.16 ) |
| C3 - F8  | 0.09 ( 0.04 - 0.15 ) | 0.11 ( 0.09 - 0.14 ) | 0.07 ( 0.03 - 0.17 ) | 0.07 ( 0.01 - 0.20 ) |
| C3 - Fp2 | 0.05 ( 0.03 - 0.08 ) | 0.07 ( 0.04 - 0.13 ) | 0.07 ( 0.05 - 0.13 ) | 0.06 ( 0.04 - 0.09 ) |
| C3 - AF7 | 0.06 ( 0.03 - 0.08 ) | 0.11 ( 0.04 - 0.19 ) | 0.05 ( 0.04 - 0.06 ) | 0.09 ( 0.03 - 0.15 ) |
| C3 - AF3 | 0.04 ( 0.02 - 0.08 ) | 0.12 ( 0.08 - 0.22 ) | 0.11 ( 0.03 - 0.16 ) | 0.05 ( 0.03 - 0.11 ) |
| C3 - AFz | 0.08 ( 0.03 - 0.10 ) | 0.15 ( 0.07 - 0.21 ) | 0.05 ( 0.02 - 0.12 ) | 0.09 ( 0.02 - 0.22 ) |
| C3 - F1  | 0.07 ( 0.03 - 0.22 ) | 0.13 ( 0.10 - 0.20 ) | 0.14 ( 0.10 - 0.20 ) | 0.15 ( 0.08 - 0.22 ) |
| C3 - F5  | 0.11 ( 0.02 - 0.14 ) | 0.17 ( 0.10 - 0.26 ) | 0.17 ( 0.09 - 0.22 ) | 0.13 ( 0.08 - 0.24 ) |
| C3 - FT7 | 0.07 ( 0.03 - 0.13 ) | 0.12 ( 0.04 - 0.20 ) | 0.05 ( 0.01 - 0.08 ) | 0.09 ( 0.04 - 0.13 ) |
| C3 - FC3 | 0.09 ( 0.09 - 0.22 ) | 0.16 ( 0.07 - 0.22 ) | 0.10 ( 0.07 - 0.21 ) | 0.11 ( 0.08 - 0.21 ) |
| C3 - C1  | 0.07 ( 0.03 - 0.10 ) | 0.10 ( 0.05 - 0.29 ) | 0.04 ( 0.02 - 0.07 ) | 0.14 ( 0.05 - 0.16 ) |
| C3 - C5  | 0.06 ( 0.03 - 0.11 ) | 0.09 ( 0.06 - 0.21 ) | 0.10 ( 0.02 - 0.17 ) | 0.10 ( 0.06 - 0.19 ) |

|          |                      |                      |                      |                      |
|----------|----------------------|----------------------|----------------------|----------------------|
| C3 - TP7 | 0.08 ( 0.05 - 0.13 ) | 0.08 ( 0.05 - 0.14 ) | 0.10 ( 0.02 - 0.16 ) | 0.07 ( 0.05 - 0.10 ) |
| C3 - CP3 | 0.08 ( 0.06 - 0.11 ) | 0.08 ( 0.04 - 0.19 ) | 0.06 ( 0.04 - 0.13 ) | 0.09 ( 0.07 - 0.13 ) |
| C3 - P1  | 0.04 ( 0.01 - 0.10 ) | 0.09 ( 0.05 - 0.19 ) | 0.10 ( 0.03 - 0.18 ) | 0.07 ( 0.03 - 0.10 ) |
| C3 - P5  | 0.11 ( 0.05 - 0.16 ) | 0.07 ( 0.05 - 0.15 ) | 0.08 ( 0.04 - 0.11 ) | 0.08 ( 0.05 - 0.15 ) |
| C3 - PO7 | 0.10 ( 0.03 - 0.20 ) | 0.03 ( 0.01 - 0.21 ) | 0.09 ( 0.05 - 0.15 ) | 0.07 ( 0.03 - 0.11 ) |
| C3 - PO3 | 0.08 ( 0.04 - 0.15 ) | 0.10 ( 0.02 - 0.13 ) | 0.07 ( 0.03 - 0.20 ) | 0.07 ( 0.03 - 0.16 ) |
| C3 - POz | 0.07 ( 0.04 - 0.10 ) | 0.08 ( 0.05 - 0.16 ) | 0.10 ( 0.05 - 0.19 ) | 0.08 ( 0.05 - 0.13 ) |
| C3 - PO4 | 0.07 ( 0.04 - 0.10 ) | 0.12 ( 0.06 - 0.18 ) | 0.07 ( 0.05 - 0.09 ) | 0.06 ( 0.03 - 0.09 ) |
| C3 - PO8 | 0.04 ( 0.03 - 0.10 ) | 0.11 ( 0.03 - 0.16 ) | 0.04 ( 0.02 - 0.09 ) | 0.05 ( 0.03 - 0.09 ) |
| C3 - P6  | 0.09 ( 0.05 - 0.16 ) | 0.09 ( 0.07 - 0.12 ) | 0.05 ( 0.02 - 0.07 ) | 0.05 ( 0.01 - 0.09 ) |
| C3 - P2  | 0.03 ( 0.01 - 0.08 ) | 0.09 ( 0.07 - 0.11 ) | 0.11 ( 0.02 - 0.14 ) | 0.06 ( 0.03 - 0.09 ) |
| C3 - CPz | 0.10 ( 0.08 - 0.14 ) | 0.17 ( 0.08 - 0.20 ) | 0.09 ( 0.02 - 0.23 ) | 0.14 ( 0.07 - 0.19 ) |
| C3 - CP4 | 0.05 ( 0.04 - 0.06 ) | 0.08 ( 0.03 - 0.13 ) | 0.07 ( 0.02 - 0.11 ) | 0.07 ( 0.03 - 0.08 ) |
| C3 - TP8 | 0.09 ( 0.03 - 0.15 ) | 0.07 ( 0.04 - 0.16 ) | 0.07 ( 0.04 - 0.11 ) | 0.09 ( 0.04 - 0.13 ) |

|          |                      |                      |                      |                      |
|----------|----------------------|----------------------|----------------------|----------------------|
| C3 - C6  | 0.06 ( 0.05 - 0.08 ) | 0.10 ( 0.05 - 0.12 ) | 0.09 ( 0.04 - 0.13 ) | 0.09 ( 0.04 - 0.12 ) |
| C3 - C2  | 0.06 ( 0.04 - 0.13 ) | 0.11 ( 0.03 - 0.19 ) | 0.07 ( 0.04 - 0.12 ) | 0.09 ( 0.04 - 0.11 ) |
| C3 - FC4 | 0.06 ( 0.03 - 0.13 ) | 0.11 ( 0.04 - 0.15 ) | 0.13 ( 0.08 - 0.16 ) | 0.10 ( 0.08 - 0.13 ) |
| C3 - FT8 | 0.10 ( 0.06 - 0.16 ) | 0.08 ( 0.05 - 0.18 ) | 0.11 ( 0.06 - 0.15 ) | 0.07 ( 0.02 - 0.09 ) |
| C3 - F6  | 0.08 ( 0.05 - 0.11 ) | 0.10 ( 0.08 - 0.14 ) | 0.09 ( 0.05 - 0.14 ) | 0.10 ( 0.03 - 0.16 ) |
| C3 - AF8 | 0.06 ( 0.03 - 0.10 ) | 0.09 ( 0.07 - 0.11 ) | 0.05 ( 0.02 - 0.11 ) | 0.08 ( 0.04 - 0.13 ) |
| C3 - AF4 | 0.03 ( 0.02 - 0.06 ) | 0.08 ( 0.05 - 0.13 ) | 0.09 ( 0.04 - 0.15 ) | 0.10 ( 0.05 - 0.15 ) |
| C3 - F2  | 0.10 ( 0.07 - 0.13 ) | 0.09 ( 0.04 - 0.14 ) | 0.07 ( 0.05 - 0.21 ) | 0.09 ( 0.04 - 0.25 ) |

alpha

|          |                      |                      |                      |                      |
|----------|----------------------|----------------------|----------------------|----------------------|
| C3 - Fp1 | 0.16 ( 0.04 - 0.27 ) | 0.09 ( 0.04 - 0.16 ) | 0.19 ( 0.07 - 0.25 ) | 0.15 ( 0.07 - 0.21 ) |
| C3 - Fz  | 0.16 ( 0.10 - 0.21 ) | 0.13 ( 0.07 - 0.18 ) | 0.09 ( 0.03 - 0.18 ) | 0.17 ( 0.10 - 0.21 ) |
| C3 - F3  | 0.15 ( 0.07 - 0.19 ) | 0.19 ( 0.14 - 0.25 ) | 0.12 ( 0.05 - 0.22 ) | 0.23 ( 0.14 - 0.28 ) |
| C3 - F7  | 0.13 ( 0.06 - 0.19 ) | 0.12 ( 0.05 - 0.18 ) | 0.13 ( 0.07 - 0.18 ) | 0.15 ( 0.02 - 0.19 ) |
| C3 - FT9 | 0.19 ( 0.09 - 0.23 ) | 0.12 ( 0.06 - 0.20 ) | 0.14 ( 0.08 - 0.19 ) | 0.19 ( 0.12 - 0.31 ) |
| C3 - FC5 | 0.12 ( 0.08 - 0.17 ) | 0.13 ( 0.11 - 0.26 ) | 0.08 ( 0.05 - 0.21 ) | 0.22 ( 0.19 - 0.27 ) |



|           |                      |                      |                      |                      |
|-----------|----------------------|----------------------|----------------------|----------------------|
| C3 - FC1  | 0.20 ( 0.09 - 0.29 ) | 0.22 ( 0.11 - 0.33 ) | 0.18 ( 0.12 - 0.31 ) | 0.34 ( 0.15 - 0.40 ) |
| C3 - T7   | 0.10 ( 0.04 - 0.18 ) | 0.15 ( 0.04 - 0.33 ) | 0.21 ( 0.08 - 0.29 ) | 0.15 ( 0.07 - 0.25 ) |
| C3 - TP9  | 0.17 ( 0.09 - 0.21 ) | 0.16 ( 0.08 - 0.34 ) | 0.20 ( 0.09 - 0.32 ) | 0.18 ( 0.07 - 0.26 ) |
| C3 - CP5  | 0.27 ( 0.09 - 0.33 ) | 0.24 ( 0.11 - 0.35 ) | 0.22 ( 0.19 - 0.30 ) | 0.22 ( 0.15 - 0.34 ) |
| C3 - CP1  | 0.09 ( 0.03 - 0.35 ) | 0.12 ( 0.07 - 0.36 ) | 0.20 ( 0.05 - 0.26 ) | 0.15 ( 0.10 - 0.20 ) |
| C3 - Pz   | 0.15 ( 0.11 - 0.45 ) | 0.11 ( 0.05 - 0.28 ) | 0.28 ( 0.15 - 0.43 ) | 0.18 ( 0.08 - 0.34 ) |
| C3 - P3   | 0.43 ( 0.16 - 0.53 ) | 0.28 ( 0.17 - 0.46 ) | 0.33 ( 0.13 - 0.57 ) | 0.48 ( 0.36 - 0.50 ) |
| C3 - P7   | 0.22 ( 0.05 - 0.26 ) | 0.20 ( 0.15 - 0.24 ) | 0.25 ( 0.15 - 0.42 ) | 0.34 ( 0.24 - 0.50 ) |
| C3 - O1   | 0.09 ( 0.07 - 0.19 ) | 0.17 ( 0.03 - 0.29 ) | 0.21 ( 0.14 - 0.35 ) | 0.21 ( 0.16 - 0.28 ) |
| C3 - Oz   | 0.11 ( 0.08 - 0.22 ) | 0.08 ( 0.03 - 0.21 ) | 0.14 ( 0.09 - 0.21 ) | 0.14 ( 0.07 - 0.23 ) |
| C3 - O2   | 0.15 ( 0.12 - 0.19 ) | 0.10 ( 0.08 - 0.19 ) | 0.12 ( 0.04 - 0.21 ) | 0.17 ( 0.11 - 0.23 ) |
| C3 - P4   | 0.11 ( 0.08 - 0.31 ) | 0.11 ( 0.06 - 0.23 ) | 0.13 ( 0.03 - 0.36 ) | 0.19 ( 0.02 - 0.43 ) |
| C3 - P8   | 0.11 ( 0.06 - 0.25 ) | 0.19 ( 0.09 - 0.27 ) | 0.13 ( 0.09 - 0.28 ) | 0.26 ( 0.15 - 0.34 ) |
| C3 - TP10 | 0.15 ( 0.04 - 0.26 ) | 0.10 ( 0.06 - 0.20 ) | 0.09 ( 0.05 - 0.21 ) | 0.17 ( 0.07 - 0.23 ) |

|           |                      |                      |                      |                      |
|-----------|----------------------|----------------------|----------------------|----------------------|
| C3 - CP6  | 0.16 ( 0.07 - 0.22 ) | 0.09 ( 0.04 - 0.11 ) | 0.12 ( 0.07 - 0.16 ) | 0.14 ( 0.08 - 0.37 ) |
| C3 - CP2  | 0.09 ( 0.05 - 0.20 ) | 0.18 ( 0.04 - 0.23 ) | 0.18 ( 0.07 - 0.33 ) | 0.11 ( 0.04 - 0.24 ) |
| C3 - Cz   | 0.23 ( 0.09 - 0.41 ) | 0.21 ( 0.13 - 0.28 ) | 0.22 ( 0.14 - 0.33 ) | 0.35 ( 0.25 - 0.50 ) |
| C3 - C4   | 0.06 ( 0.04 - 0.19 ) | 0.09 ( 0.06 - 0.15 ) | 0.07 ( 0.04 - 0.18 ) | 0.10 ( 0.04 - 0.18 ) |
| C3 - T8   | 0.16 ( 0.07 - 0.20 ) | 0.06 ( 0.05 - 0.13 ) | 0.08 ( 0.04 - 0.15 ) | 0.13 ( 0.09 - 0.26 ) |
| C3 - FT10 | 0.11 ( 0.09 - 0.22 ) | 0.15 ( 0.07 - 0.25 ) | 0.18 ( 0.08 - 0.29 ) | 0.17 ( 0.06 - 0.24 ) |
| C3 - FC6  | 0.09 ( 0.03 - 0.17 ) | 0.06 ( 0.03 - 0.19 ) | 0.13 ( 0.02 - 0.19 ) | 0.08 ( 0.06 - 0.21 ) |
| C3 - FC2  | 0.11 ( 0.08 - 0.20 ) | 0.17 ( 0.11 - 0.24 ) | 0.15 ( 0.08 - 0.27 ) | 0.19 ( 0.11 - 0.28 ) |
| C3 - F4   | 0.09 ( 0.05 - 0.17 ) | 0.05 ( 0.04 - 0.15 ) | 0.07 ( 0.02 - 0.15 ) | 0.09 ( 0.03 - 0.15 ) |
| C3 - F8   | 0.12 ( 0.08 - 0.15 ) | 0.17 ( 0.12 - 0.22 ) | 0.10 ( 0.02 - 0.16 ) | 0.16 ( 0.07 - 0.27 ) |
| C3 - Fp2  | 0.15 ( 0.05 - 0.30 ) | 0.12 ( 0.02 - 0.21 ) | 0.08 ( 0.02 - 0.23 ) | 0.14 ( 0.09 - 0.23 ) |
| C3 - AF7  | 0.13 ( 0.09 - 0.20 ) | 0.10 ( 0.06 - 0.20 ) | 0.17 ( 0.10 - 0.32 ) | 0.13 ( 0.08 - 0.18 ) |
| C3 - AF3  | 0.10 ( 0.08 - 0.14 ) | 0.10 ( 0.04 - 0.22 ) | 0.09 ( 0.08 - 0.25 ) | 0.20 ( 0.14 - 0.28 ) |
| C3 - AFz  | 0.11 ( 0.08 - 0.15 ) | 0.13 ( 0.04 - 0.21 ) | 0.15 ( 0.03 - 0.20 ) | 0.14 ( 0.09 - 0.28 ) |

|          |                      |                      |                      |                      |
|----------|----------------------|----------------------|----------------------|----------------------|
| C3 - F1  | 0.16 ( 0.06 - 0.24 ) | 0.13 ( 0.08 - 0.20 ) | 0.12 ( 0.08 - 0.16 ) | 0.19 ( 0.07 - 0.23 ) |
| C3 - F5  | 0.14 ( 0.09 - 0.19 ) | 0.23 ( 0.06 - 0.32 ) | 0.13 ( 0.09 - 0.18 ) | 0.14 ( 0.07 - 0.21 ) |
| C3 - FT7 | 0.14 ( 0.11 - 0.18 ) | 0.06 ( 0.04 - 0.19 ) | 0.19 ( 0.05 - 0.23 ) | 0.16 ( 0.02 - 0.29 ) |
| C3 - FC3 | 0.09 ( 0.04 - 0.18 ) | 0.26 ( 0.11 - 0.32 ) | 0.13 ( 0.04 - 0.19 ) | 0.19 ( 0.10 - 0.29 ) |
| C3 - C1  | 0.21 ( 0.06 - 0.32 ) | 0.25 ( 0.10 - 0.26 ) | 0.22 ( 0.16 - 0.30 ) | 0.35 ( 0.21 - 0.53 ) |
| C3 - C5  | 0.10 ( 0.04 - 0.19 ) | 0.09 ( 0.05 - 0.23 ) | 0.12 ( 0.05 - 0.31 ) | 0.19 ( 0.08 - 0.27 ) |
| C3 - TP7 | 0.15 ( 0.08 - 0.23 ) | 0.26 ( 0.10 - 0.35 ) | 0.24 ( 0.07 - 0.31 ) | 0.20 ( 0.09 - 0.34 ) |
| C3 - CP3 | 0.36 ( 0.15 - 0.48 ) | 0.29 ( 0.17 - 0.36 ) | 0.24 ( 0.13 - 0.40 ) | 0.33 ( 0.18 - 0.41 ) |
| C3 - P1  | 0.28 ( 0.09 - 0.49 ) | 0.19 ( 0.13 - 0.38 ) | 0.31 ( 0.14 - 0.53 ) | 0.33 ( 0.24 - 0.44 ) |
| C3 - P5  | 0.36 ( 0.21 - 0.41 ) | 0.32 ( 0.24 - 0.39 ) | 0.39 ( 0.18 - 0.54 ) | 0.47 ( 0.37 - 0.54 ) |
| C3 - PO7 | 0.14 ( 0.09 - 0.25 ) | 0.21 ( 0.15 - 0.35 ) | 0.30 ( 0.09 - 0.47 ) | 0.35 ( 0.19 - 0.47 ) |
| C3 - PO3 | 0.30 ( 0.09 - 0.39 ) | 0.22 ( 0.15 - 0.45 ) | 0.38 ( 0.13 - 0.57 ) | 0.38 ( 0.30 - 0.46 ) |
| C3 - POz | 0.24 ( 0.10 - 0.32 ) | 0.17 ( 0.11 - 0.22 ) | 0.27 ( 0.13 - 0.39 ) | 0.18 ( 0.06 - 0.35 ) |
| C3 - PO4 | 0.13 ( 0.09 - 0.30 ) | 0.09 ( 0.05 - 0.17 ) | 0.17 ( 0.11 - 0.27 ) | 0.16 ( 0.13 - 0.35 ) |

|          |                      |                      |                      |                      |
|----------|----------------------|----------------------|----------------------|----------------------|
| C3 - PO8 | 0.13 ( 0.05 - 0.32 ) | 0.13 ( 0.07 - 0.22 ) | 0.12 ( 0.10 - 0.22 ) | 0.21 ( 0.16 - 0.31 ) |
| C3 - P6  | 0.19 ( 0.11 - 0.25 ) | 0.17 ( 0.04 - 0.24 ) | 0.13 ( 0.10 - 0.20 ) | 0.28 ( 0.21 - 0.36 ) |
| C3 - P2  | 0.08 ( 0.06 - 0.35 ) | 0.12 ( 0.04 - 0.20 ) | 0.13 ( 0.05 - 0.40 ) | 0.15 ( 0.02 - 0.30 ) |
| C3 - CPz | 0.14 ( 0.03 - 0.31 ) | 0.11 ( 0.05 - 0.23 ) | 0.14 ( 0.09 - 0.21 ) | 0.09 ( 0.03 - 0.22 ) |
| C3 - CP4 | 0.17 ( 0.10 - 0.25 ) | 0.07 ( 0.04 - 0.21 ) | 0.23 ( 0.05 - 0.33 ) | 0.14 ( 0.07 - 0.22 ) |
| C3 - TP8 | 0.09 ( 0.03 - 0.14 ) | 0.13 ( 0.10 - 0.17 ) | 0.11 ( 0.08 - 0.14 ) | 0.18 ( 0.05 - 0.33 ) |
| C3 - C6  | 0.12 ( 0.06 - 0.18 ) | 0.09 ( 0.08 - 0.20 ) | 0.10 ( 0.06 - 0.15 ) | 0.16 ( 0.03 - 0.19 ) |
| C3 - C2  | 0.09 ( 0.03 - 0.14 ) | 0.12 ( 0.04 - 0.13 ) | 0.10 ( 0.03 - 0.16 ) | 0.13 ( 0.08 - 0.21 ) |
| C3 - FC4 | 0.07 ( 0.04 - 0.11 ) | 0.09 ( 0.08 - 0.15 ) | 0.06 ( 0.04 - 0.16 ) | 0.11 ( 0.05 - 0.19 ) |
| C3 - FT8 | 0.12 ( 0.08 - 0.16 ) | 0.15 ( 0.10 - 0.21 ) | 0.11 ( 0.02 - 0.17 ) | 0.16 ( 0.08 - 0.27 ) |
| C3 - F6  | 0.12 ( 0.09 - 0.16 ) | 0.13 ( 0.05 - 0.19 ) | 0.06 ( 0.03 - 0.18 ) | 0.09 ( 0.04 - 0.21 ) |
| C3 - AF8 | 0.10 ( 0.04 - 0.27 ) | 0.12 ( 0.07 - 0.17 ) | 0.18 ( 0.08 - 0.25 ) | 0.23 ( 0.16 - 0.31 ) |
| C3 - AF4 | 0.08 ( 0.05 - 0.17 ) | 0.14 ( 0.07 - 0.18 ) | 0.10 ( 0.07 - 0.17 ) | 0.20 ( 0.10 - 0.31 ) |
| C3 - F2  | 0.13 ( 0.05 - 0.16 ) | 0.11 ( 0.07 - 0.12 ) | 0.05 ( 0.03 - 0.21 ) | 0.10 ( 0.07 - 0.21 ) |

beta

|          |                      |                      |                      |                      |
|----------|----------------------|----------------------|----------------------|----------------------|
| C3 - Fp1 | 0.03 ( 0.01 - 0.05 ) | 0.03 ( 0.02 - 0.05 ) | 0.03 ( 0.03 - 0.07 ) | 0.02 ( 0.01 - 0.05 ) |
| C3 - Fz  | 0.06 ( 0.05 - 0.07 ) | 0.03 ( 0.01 - 0.06 ) | 0.07 ( 0.04 - 0.09 ) | 0.06 ( 0.03 - 0.09 ) |
| C3 - F3  | 0.02 ( 0.01 - 0.07 ) | 0.03 ( 0.02 - 0.04 ) | 0.03 ( 0.01 - 0.04 ) | 0.05 ( 0.03 - 0.10 ) |
| C3 - F7  | 0.04 ( 0.02 - 0.05 ) | 0.03 ( 0.01 - 0.06 ) | 0.04 ( 0.03 - 0.05 ) | 0.06 ( 0.03 - 0.09 ) |
| C3 - FT9 | 0.03 ( 0.02 - 0.06 ) | 0.02 ( 0.01 - 0.05 ) | 0.02 ( 0.01 - 0.03 ) | 0.04 ( 0.02 - 0.08 ) |
| C3 - FC5 | 0.03 ( 0.02 - 0.04 ) | 0.05 ( 0.02 - 0.06 ) | 0.07 ( 0.04 - 0.13 ) | 0.08 ( 0.05 - 0.14 ) |
| C3 - FC1 | 0.05 ( 0.04 - 0.09 ) | 0.08 ( 0.03 - 0.13 ) | 0.08 ( 0.04 - 0.12 ) | 0.08 ( 0.03 - 0.14 ) |
| C3 - T7  | 0.09 ( 0.04 - 0.11 ) | 0.08 ( 0.02 - 0.11 ) | 0.07 ( 0.04 - 0.09 ) | 0.05 ( 0.02 - 0.13 ) |
| C3 - TP9 | 0.04 ( 0.02 - 0.06 ) | 0.06 ( 0.04 - 0.09 ) | 0.05 ( 0.02 - 0.07 ) | 0.06 ( 0.04 - 0.07 ) |
| C3 - CP5 | 0.16 ( 0.12 - 0.18 ) | 0.04 ( 0.03 - 0.15 ) | 0.09 ( 0.05 - 0.15 ) | 0.13 ( 0.09 - 0.22 ) |
| C3 - CP1 | 0.06 ( 0.03 - 0.11 ) | 0.06 ( 0.01 - 0.10 ) | 0.08 ( 0.04 - 0.14 ) | 0.06 ( 0.04 - 0.08 ) |
| C3 - Pz  | 0.03 ( 0.01 - 0.06 ) | 0.04 ( 0.03 - 0.07 ) | 0.04 ( 0.02 - 0.10 ) | 0.03 ( 0.02 - 0.05 ) |
| C3 - P3  | 0.10 ( 0.07 - 0.11 ) | 0.07 ( 0.03 - 0.11 ) | 0.11 ( 0.05 - 0.14 ) | 0.12 ( 0.07 - 0.19 ) |
| C3 - P7  | 0.15 ( 0.09 - 0.19 ) | 0.09 ( 0.05 - 0.13 ) | 0.12 ( 0.05 - 0.17 ) | 0.11 ( 0.07 - 0.20 ) |

|           |                      |                      |                      |                      |
|-----------|----------------------|----------------------|----------------------|----------------------|
| C3 - O1   | 0.03 ( 0.01 - 0.06 ) | 0.04 ( 0.02 - 0.07 ) | 0.04 ( 0.02 - 0.09 ) | 0.03 ( 0.01 - 0.05 ) |
| C3 - Oz   | 0.02 ( 0.01 - 0.05 ) | 0.03 ( 0.01 - 0.04 ) | 0.03 ( 0.02 - 0.05 ) | 0.03 ( 0.01 - 0.06 ) |
| C3 - O2   | 0.03 ( 0.01 - 0.04 ) | 0.02 ( 0.01 - 0.05 ) | 0.06 ( 0.04 - 0.08 ) | 0.02 ( 0.01 - 0.04 ) |
| C3 - P4   | 0.03 ( 0.03 - 0.05 ) | 0.03 ( 0.02 - 0.06 ) | 0.02 ( 0.01 - 0.08 ) | 0.03 ( 0.02 - 0.04 ) |
| C3 - P8   | 0.05 ( 0.02 - 0.08 ) | 0.05 ( 0.03 - 0.07 ) | 0.02 ( 0.01 - 0.04 ) | 0.02 ( 0.02 - 0.04 ) |
| C3 - TP10 | 0.02 ( 0.01 - 0.03 ) | 0.02 ( 0.02 - 0.04 ) | 0.04 ( 0.01 - 0.06 ) | 0.03 ( 0.02 - 0.05 ) |
| C3 - CP6  | 0.03 ( 0.03 - 0.06 ) | 0.04 ( 0.03 - 0.06 ) | 0.04 ( 0.04 - 0.06 ) | 0.05 ( 0.03 - 0.10 ) |
| C3 - CP2  | 0.02 ( 0.02 - 0.04 ) | 0.03 ( 0.01 - 0.05 ) | 0.03 ( 0.01 - 0.03 ) | 0.04 ( 0.02 - 0.07 ) |
| C3 - Cz   | 0.07 ( 0.03 - 0.09 ) | 0.06 ( 0.02 - 0.10 ) | 0.07 ( 0.05 - 0.10 ) | 0.07 ( 0.05 - 0.15 ) |
| C3 - C4   | 0.03 ( 0.02 - 0.06 ) | 0.03 ( 0.02 - 0.05 ) | 0.04 ( 0.03 - 0.05 ) | 0.02 ( 0.02 - 0.06 ) |
| C3 - T8   | 0.02 ( 0.01 - 0.02 ) | 0.04 ( 0.01 - 0.06 ) | 0.04 ( 0.01 - 0.07 ) | 0.03 ( 0.02 - 0.05 ) |
| C3 - FT10 | 0.03 ( 0.02 - 0.05 ) | 0.02 ( 0.01 - 0.06 ) | 0.02 ( 0.02 - 0.03 ) | 0.04 ( 0.03 - 0.07 ) |
| C3 - FC6  | 0.03 ( 0.02 - 0.06 ) | 0.05 ( 0.02 - 0.06 ) | 0.04 ( 0.03 - 0.05 ) | 0.02 ( 0.01 - 0.05 ) |
| C3 - FC2  | 0.04 ( 0.02 - 0.06 ) | 0.04 ( 0.03 - 0.07 ) | 0.04 ( 0.03 - 0.07 ) | 0.03 ( 0.01 - 0.06 ) |

|          |                      |                      |                      |                      |
|----------|----------------------|----------------------|----------------------|----------------------|
| C3 - F4  | 0.05 ( 0.02 - 0.06 ) | 0.04 ( 0.01 - 0.06 ) | 0.02 ( 0.01 - 0.03 ) | 0.05 ( 0.02 - 0.09 ) |
| C3 - F8  | 0.04 ( 0.02 - 0.07 ) | 0.03 ( 0.02 - 0.06 ) | 0.02 ( 0.01 - 0.06 ) | 0.03 ( 0.01 - 0.06 ) |
| C3 - Fp2 | 0.04 ( 0.02 - 0.06 ) | 0.03 ( 0.01 - 0.05 ) | 0.05 ( 0.03 - 0.07 ) | 0.03 ( 0.02 - 0.09 ) |
| C3 - AF7 | 0.02 ( 0.02 - 0.04 ) | 0.02 ( 0.01 - 0.06 ) | 0.05 ( 0.03 - 0.09 ) | 0.05 ( 0.03 - 0.08 ) |
| C3 - AF3 | 0.05 ( 0.01 - 0.09 ) | 0.03 ( 0.01 - 0.04 ) | 0.04 ( 0.01 - 0.07 ) | 0.06 ( 0.02 - 0.09 ) |
| C3 - AFz | 0.04 ( 0.02 - 0.05 ) | 0.02 ( 0.01 - 0.04 ) | 0.05 ( 0.02 - 0.06 ) | 0.04 ( 0.02 - 0.07 ) |
| C3 - F1  | 0.05 ( 0.03 - 0.08 ) | 0.03 ( 0.01 - 0.05 ) | 0.08 ( 0.02 - 0.11 ) | 0.05 ( 0.03 - 0.09 ) |
| C3 - F5  | 0.03 ( 0.02 - 0.04 ) | 0.03 ( 0.02 - 0.07 ) | 0.04 ( 0.03 - 0.05 ) | 0.10 ( 0.04 - 0.13 ) |
| C3 - FT7 | 0.07 ( 0.06 - 0.10 ) | 0.05 ( 0.02 - 0.07 ) | 0.04 ( 0.03 - 0.10 ) | 0.06 ( 0.02 - 0.07 ) |
| C3 - FC3 | 0.04 ( 0.02 - 0.07 ) | 0.04 ( 0.01 - 0.07 ) | 0.04 ( 0.02 - 0.07 ) | 0.08 ( 0.03 - 0.14 ) |
| C3 - C1  | 0.09 ( 0.05 - 0.14 ) | 0.07 ( 0.04 - 0.12 ) | 0.08 ( 0.03 - 0.11 ) | 0.09 ( 0.06 - 0.15 ) |
| C3 - C5  | 0.08 ( 0.06 - 0.14 ) | 0.07 ( 0.06 - 0.09 ) | 0.06 ( 0.03 - 0.07 ) | 0.07 ( 0.04 - 0.11 ) |
| C3 - TP7 | 0.12 ( 0.06 - 0.17 ) | 0.07 ( 0.05 - 0.14 ) | 0.08 ( 0.05 - 0.13 ) | 0.09 ( 0.07 - 0.14 ) |
| C3 - CP3 | 0.09 ( 0.06 - 0.13 ) | 0.06 ( 0.05 - 0.09 ) | 0.12 ( 0.07 - 0.15 ) | 0.10 ( 0.05 - 0.18 ) |

|          |                      |                      |                      |                      |
|----------|----------------------|----------------------|----------------------|----------------------|
| C3 - P1  | 0.07 ( 0.05 - 0.08 ) | 0.05 ( 0.03 - 0.08 ) | 0.09 ( 0.03 - 0.10 ) | 0.08 ( 0.03 - 0.10 ) |
| C3 - P5  | 0.12 ( 0.09 - 0.19 ) | 0.08 ( 0.04 - 0.14 ) | 0.14 ( 0.03 - 0.16 ) | 0.13 ( 0.11 - 0.23 ) |
| C3 - PO7 | 0.09 ( 0.03 - 0.13 ) | 0.06 ( 0.03 - 0.12 ) | 0.10 ( 0.02 - 0.13 ) | 0.07 ( 0.04 - 0.09 ) |
| C3 - PO3 | 0.06 ( 0.03 - 0.10 ) | 0.05 ( 0.02 - 0.10 ) | 0.07 ( 0.02 - 0.13 ) | 0.04 ( 0.02 - 0.07 ) |
| C3 - POz | 0.03 ( 0.02 - 0.04 ) | 0.04 ( 0.02 - 0.05 ) | 0.04 ( 0.02 - 0.05 ) | 0.02 ( 0.01 - 0.04 ) |
| C3 - PO4 | 0.03 ( 0.02 - 0.05 ) | 0.03 ( 0.02 - 0.06 ) | 0.04 ( 0.02 - 0.07 ) | 0.02 ( 0.01 - 0.05 ) |
| C3 - PO8 | 0.03 ( 0.02 - 0.05 ) | 0.04 ( 0.02 - 0.04 ) | 0.04 ( 0.02 - 0.07 ) | 0.02 ( 0.01 - 0.04 ) |
| C3 - P6  | 0.04 ( 0.02 - 0.06 ) | 0.05 ( 0.02 - 0.06 ) | 0.04 ( 0.01 - 0.07 ) | 0.01 ( 0.01 - 0.04 ) |
| C3 - P2  | 0.05 ( 0.02 - 0.07 ) | 0.02 ( 0.01 - 0.04 ) | 0.04 ( 0.03 - 0.06 ) | 0.04 ( 0.03 - 0.04 ) |
| C3 - CPz | 0.03 ( 0.01 - 0.07 ) | 0.05 ( 0.02 - 0.11 ) | 0.07 ( 0.05 - 0.12 ) | 0.06 ( 0.04 - 0.14 ) |
| C3 - CP4 | 0.02 ( 0.01 - 0.03 ) | 0.05 ( 0.04 - 0.06 ) | 0.04 ( 0.02 - 0.08 ) | 0.07 ( 0.04 - 0.08 ) |
| C3 - TP8 | 0.02 ( 0.02 - 0.07 ) | 0.05 ( 0.03 - 0.08 ) | 0.04 ( 0.00 - 0.06 ) | 0.05 ( 0.03 - 0.05 ) |
| C3 - C6  | 0.02 ( 0.02 - 0.04 ) | 0.02 ( 0.01 - 0.05 ) | 0.04 ( 0.02 - 0.05 ) | 0.02 ( 0.01 - 0.07 ) |
| C3 - C2  | 0.02 ( 0.01 - 0.05 ) | 0.03 ( 0.02 - 0.04 ) | 0.03 ( 0.01 - 0.04 ) | 0.02 ( 0.01 - 0.09 ) |



|          |                      |                      |                      |                      |
|----------|----------------------|----------------------|----------------------|----------------------|
| C3 - FC4 | 0.03 ( 0.02 - 0.05 ) | 0.03 ( 0.02 - 0.07 ) | 0.04 ( 0.02 - 0.04 ) | 0.05 ( 0.02 - 0.06 ) |
| C3 - FT8 | 0.04 ( 0.02 - 0.06 ) | 0.02 ( 0.01 - 0.04 ) | 0.03 ( 0.01 - 0.05 ) | 0.03 ( 0.01 - 0.06 ) |
| C3 - F6  | 0.05 ( 0.03 - 0.08 ) | 0.04 ( 0.03 - 0.05 ) | 0.03 ( 0.01 - 0.04 ) | 0.04 ( 0.02 - 0.07 ) |
| C3 - AF8 | 0.05 ( 0.04 - 0.09 ) | 0.02 ( 0.01 - 0.04 ) | 0.04 ( 0.03 - 0.07 ) | 0.05 ( 0.02 - 0.07 ) |
| C3 - AF4 | 0.04 ( 0.04 - 0.05 ) | 0.02 ( 0.01 - 0.03 ) | 0.04 ( 0.02 - 0.04 ) | 0.03 ( 0.02 - 0.09 ) |
| C3 - F2  | 0.06 ( 0.04 - 0.09 ) | 0.04 ( 0.02 - 0.05 ) | 0.03 ( 0.02 - 0.05 ) | 0.05 ( 0.01 - 0.09 ) |

Supplementary Table S2

The wPLI before and during the intervention for each frequency band.
